1 **Genome-wide association and genomic prediction of growth traits in the European flat**  
2 **oyster (*Ostrea edulis*)**

3

4 Carolina Peñaloza<sup>1</sup>, Agustin Barria<sup>1</sup>, Athina Papadopoulou<sup>5</sup>, Chantelle Hooper<sup>5</sup>, Joanne  
5 Preston<sup>2</sup>, Matthew Green<sup>5</sup>, Luke Helmer<sup>2,3,4</sup>, Jacob Kean Hammerson<sup>3</sup>, Jennifer Nascimento-  
6 Schulze<sup>5,6</sup>, Diana Minardi<sup>5</sup>, Manu Kumar Gundappa<sup>1</sup>, Daniel J Macqueen<sup>1</sup>, John Hamilton<sup>7</sup>,  
7 Ross D Houston<sup>1,8†\*</sup> & Tim P Bean<sup>1†\*</sup>

8 †These authors contributed equally to this work

9 <sup>1</sup>The Roslin Institute and Royal (Dick) School of Veterinary Studies, University of Edinburgh,  
10 Midlothian, EH25 9RG, United Kingdom

11 <sup>2</sup>Institute of Marine Sciences, University of Portsmouth, Ferry Road, Eastney, PO4 9LY, United  
12 Kingdom

13 <sup>3</sup>Blue Marine Foundation, Somerset House, London, WC2R 1LA, United Kingdom

14 <sup>4</sup>Ocean and Earth Science, University of Southampton, European Way, SO14 3ZH, United  
15 Kingdom

16 <sup>5</sup>Centre for Environment, Fisheries and Aquaculture Science (Cefas), Weymouth Laboratory,  
17 Barrack road, Dorset DT4 8UB, United Kingdom

18 <sup>6</sup>University of Exeter, EX4 4PS, Exeter, United Kingdom

19 <sup>7</sup>Lochnell oysters, PA37 1QT, Oban, United Kingdom

20 <sup>8</sup>Current address: Benchmark Genetics, 1 Pioneer Building, Edinburgh Technopole, Milton  
21 Bridge, Penicuik, EH26 0GB, United Kingdom

22

23

24

25

26

27

28

29 \* Corresponding authors

30 Tim Bean: [tim.bean@roslin.ed.ac.uk](mailto:tim.bean@roslin.ed.ac.uk)

31 Ross Houston: [ross.houston@bmkgenetics.com](mailto:ross.houston@bmkgenetics.com)

32

33

34

35

## 36 ABSTRACT

37 The European flat oyster (*Ostrea edulis*) is a bivalve mollusc that was once widely distributed  
38 in Europe and represented an important food resource for humans for centuries. Populations  
39 of *O. edulis* experienced a severe decline across their biogeographic range mainly due to  
40 anthropogenic activities and disease outbreaks. To restore the economic and ecological  
41 benefits of European flat oyster populations, extensive protection and restoration efforts are  
42 in place within Europe. In line with the increasing interest in supporting restoration and oyster  
43 farming through the breeding of stocks with enhanced performance, the present study aimed  
44 to evaluate the potential of genomic selection for improving growth traits in a European flat  
45 oyster population obtained from successive mass-spawning events. Four growth-related  
46 traits were evaluated: total weight (TW), shell height (SH), shell width (SW) and shell length  
47 (SL). The heritability of the growth traits was moderate-low, with estimates of 0.45, 0.37, 0.22,  
48 and 0.32 for TW, SH, SW and SL, respectively. A genome-wide association analysis revealed a  
49 largely polygenic genetic architecture for the four growth traits, with two distinct QTLs  
50 detected on chromosome 4. To investigate whether genomic selection can be implemented  
51 in flat oyster breeding at a reduced cost, the utility of low-density SNP panels (down to 100  
52 SNPs) was assessed. Genomic prediction accuracies using the full density panel were high  
53 (>0.83 for all traits). The evaluation of the effect of reducing the number of markers used to  
54 predict genomic breeding values revealed that similar selection accuracies could be achieved  
55 for all traits with 2K SNPs as for a full panel containing 4,577 SNPs. Only slight reductions in  
56 accuracies were observed at the lowest SNP density tested (i.e. 100 SNPs), likely due to a high  
57 relatedness between individuals being included in the training and validation sets during  
58 cross-validation. Overall, our results suggest that the genetic improvement of growth traits in  
59 oysters is feasible. Nevertheless, and although low-density SNP panels appear as a promising  
60 strategy for applying GS at a reduced cost, additional populations with different degrees of  
61 genetic relationship should be assessed to derive estimates of prediction accuracies to be  
62 expected in practical breeding programmes.

63

64 **Keywords:** *Ostrea edulis*, oyster, GWAS, Genomic selection, growth, Aquaculture

65

## 66 1. INTRODUCTION

67 The European flat oyster (*Ostrea edulis*) was an abundant native bivalve species and an  
68 important fishery resource in much of Europe up to the 19<sup>th</sup> century (Pogoda 2019). However,  
69 populations of *O. edulis* experienced a severe decline across their biogeographic range due to  
70 a range of detrimental factors including overfishing and habitat degradation (Thurstan et al.  
71 2013), the subsequent invasion of non-native species (e.g. slipper limpet, *Crepidula fornicata*)  
72 (Preston et al. 2020; Helmer et al. 2019) and pathogenic diseases (Robert et al. 1991; Sas et  
73 al. 2020). The continuous decimation of native populations in the Atlantic and Mediterranean  
74 seas led to significant changes in oyster production, which progressively shifted towards  
75 farming (Korringa 1976), and eventually to the cultivation of different species including  
76 *Crassostrea angulata* (Oelig and Uf 2000) and the non-indigenous Pacific oyster (*Crassostrea*  
77 *gigas*) (Grizel and Héral 1991; Walne and Helm 1979). The Pacific oyster was introduced into  
78 Europe for aquaculture purposes owing to its favourable production traits, such as a faster  
79 growth rate and higher resistance to the main diseases affecting *C. angulata* and *O. edulis*

80 (Renault et al. 1995; Grizel and Héral 1991). Worldwide oyster production is now dominated  
81 by the Pacific oyster (97.7%), while the production of the European flat oyster remains stably  
82 low, constituting just ~0.2% of global production (FAO 2019). Despite the demand for shellfish  
83 continues to increase (Botta et al. 2020), the level of *O. edulis* production is stagnant. One of  
84 the main factors that hinders the growth of the industry is the lack of a substantial and steady  
85 supply of oyster seed (i.e. juveniles) (see Colsoul et al. (2021) for a review). Hence, the  
86 optimization of oyster larval production in hatcheries and spatting ponds is key for future  
87 European flat oyster aquaculture, as well as for restoration projects, which are also expected  
88 to rely on sustainable sources of juveniles for restocking (Pogoda et al. 2020). Importantly,  
89 the artificial propagation of flat oyster seed will facilitate the application of selective breeding  
90 programmes. Although selective breeding programmes are typically used to improve  
91 aquaculture production, they could also benefit the ecological restoration of *O. edulis*. If  
92 desirable traits such as disease resistance are found to have a strong genetic component, then  
93 increased resistance to life-limiting diseases – such as bonamiosis (Culloty et al. 2004; Naciri-  
94 Graven et al. 1998) – could potentially be achieved while maintaining the adaptive potential  
95 (i.e. genetic diversity) of restored populations.

96 Selective breeding in oysters has mainly focused on improving meat yield and quality, disease  
97 resistance, survival and growth (Toro and Newkirk, 1990; Allen et al., 1993; Ragone Calvo et  
98 al., 2003; Ward et al., 2005; Dégremont et al., 2015; De Melo et al., 2016; Proestou et al.,  
99 2016; Camara et al., 2017; Zhang et al., 2019), with a recent interest in nutritional content  
100 and shell shape (Grizzle et al., 2017; Liu et al., 2019; Meng et al., 2019; Wan et al., 2020; He  
101 et al., 2022). Among these traits, growth is comparatively simple to assess and consequently  
102 select for using phenotypic information. Although the direct comparison of heritability  
103 estimates from different studies is difficult (e.g. due to intrinsic differences between  
104 populations), estimates for growth rate in oysters tend to be moderate (e.g. 0.26 and 0.31 –  
105 De Melo et al. (2016) and Evans and Langdon (2006), respectively). As a result, fast-growing  
106 lines of oysters have been developed for some of the main commercial species, such as the  
107 Pacific (*C. gigas*) (Zhang et al. 2019), Portuguese (*C. angulata*) (Vu et al. 2020), American (*C.*  
108 *virginica*) (Varney and Wilbur 2020) and Sydney rock (*Saccostrea glomerata*) (Fitzer et al.  
109 2019) oyster. Initial attempts to genetically improve the European flat oyster *O. edulis*  
110 resulted in a 23% increase in growth rate compared to an unselected (control) line (Newkirk  
111 and Haley 1982). This striking genetic response was not replicated in a second generation of  
112 selection, possibly due to unintentional inbreeding (Newkirk and Haley 1983). Indeed, even  
113 relatively modest levels of inbreeding have been shown to significantly affect performance  
114 traits in oysters (Evans et al. 2004), highlighting the importance of an adequate management  
115 of genetic diversity in hatchery-derived stocks. Moreover, oysters and bivalves in general,  
116 appear to have a high genetic load (see for a review Plough (2016)) and, therefore, may be  
117 particularly susceptible to inbreeding depression. Hence, the incorporation of genomic tools  
118 into shellfish breeding schemes will be key for balancing genetic gain with population diversity  
119 in order to sustain the long-term progress for traits under selection.

120 A vast array of genomic tools and resources have become available for genetic research and  
121 breeding applications in oysters. For example, for economically relevant species,  
122 chromosome-level genome assemblies (Peñaloza et al. 2021; Qi et al. 2021; Modak et al.  
123 2021; Li et al. 2021), SNP arrays (Gutierrez et al. 2017; Qi et al. 2017; Lapegue et al. 2014) and  
124 medium-density linkage maps (Gutierrez et al. 2018; Li et al. 2018; Jones et al. 2013; Wang et  
125 al. 2016; Yin et al. 2020) have been produced. These resources have been applied to examine

126 the genetic basis of growth (Gutierrez et al. 2018; Jones et al. 2014; He et al. 2021), low salinity  
127 tolerance (McCarty et al. 2021), disease resistance (Gutierrez et al. 2018; Yang et al. 2022)  
128 and nutritional content (Meng et al. 2019). For the European flat oyster, high-quality genomes  
129 have recently been released (Boutet et al. 2022; Gundappa et al. 2022), which along with  
130 available high-throughput genotyping techniques (e.g. SNP arrays and genotype-by-  
131 sequencing approaches), provide the opportunity for gaining insight into the genomic  
132 architecture of relevant production traits. Most of the traits of economic importance in  
133 aquaculture species have a polygenic architecture (Zenger et al. 2019). For polygenic traits  
134 (i.e. those controlled by many loci), the application of predictive techniques such as genomic  
135 selection (GS) may enable a faster genetic gain than conventional pedigree-based selection.  
136 GS is a method based on genome-wide markers in which the effect of all loci are  
137 simultaneously used for predicting the estimated breeding values (EBV) of selection  
138 candidates (Meuwissen et al. 2001), and has shown major potential in aquaculture species,  
139 where it can be used to characterise variation within and between large families of potential  
140 breeders. However, commercial application to aquaculture production is largely limited to  
141 the major finfish and crustacean species (e.g. salmonids, Nile tilapia, tropical shrimp)  
142 (Lillehammer et al. 2020; Boudry et al. 2021; Zenger et al. 2019). Studies into the feasibility of  
143 applying genomic selection schemes in oyster breeding programmes have shown that for  
144 growth (Vu et al. 2021b; Gutierrez et al. 2018), edibility (Vu et al. 2021b), low salinity tolerance  
145 (McCarty et al. 2021), and disease resistance traits (Vu et al. 2021b; Gutierrez et al. 2020),  
146 greater genetic gains could be achieved through GS compared to traditional breeding.  
147 Nevertheless, the practical application of GS as a selection strategy will likely depend on how  
148 cost-effective it is compared to pedigree-based methods. The development of feasible  
149 alternatives for reducing genotyping costs, such as using affordable low-density genotyping  
150 tools that yield similar accuracies than higher-density panels, will be critical for the potential  
151 of GS to be realized by oyster breeding programmes.

152 In line with the increasing interest in supporting oyster culture and restoration through the  
153 breeding of stocks with enhanced performance, the overall aim of this study was to evaluate  
154 the potential of GS for the genetic improvement of growth and growth-related  
155 (morphometric) traits in the European flat oyster. First, the heritability of total weight, shell  
156 length, shell width and shell height was estimated for a hatchery-derived population  
157 genotyped using a ~15K SNP array. Second, a genome-wide association (GWAS) analysis was  
158 conducted to dissect the genetic architecture of the measured traits. Last, to evaluate  
159 whether GS may be an effective and cost-effective strategy for improving traits associated  
160 with oyster growth, the accuracy of genomic predictions using reduced density SNP marker  
161 panels was assessed.

162

## 163 **2. MATERIALS AND METHODS**

### 164 **2.1 Field experiment**

165 The European flat oyster population used in this study was generated in a UK-based hatchery  
166 (Sea Salter Morecombe hatchery) by mass spawning of approximately 40 broodstock parents  
167 over several spawning events. The resulting F1 generation was then deployed to Lochnell  
168 oysters (56.494° N, 5.459° W) and grown for six months in ortac grow-out cages. Animals were  
169 then transferred to the Institute of Marine Sciences at the University of Portsmouth (UK), and  
170 maintained in a flow-through system until deployment. During this holding period, ~1,000

171 randomly selected oysters were individually tagged and their first phenotype measurements  
172 recorded (see 'Phenotypes' section below). Prior to deployment, animals were cleaned of  
173 fouling, washed in fresh water and dried. Embossed plastic tags with unique identifier codes  
174 were attached to their shell with epoxy resin glue. Animals were returned to aquaria within  
175 the hour. Oysters were placed in Aquamesh® cages (L 0.55 m x W 0.55 m x D 0.4 m) (GT  
176 Products Europe Ltd) at a density of 200 oysters per cage, and deployed 1 metre below  
177 floating pontoons at Port Hamble Marina (MDL) in the River Hamble (50.861° N, 1.312° W) in  
178 January 2019. Mortalities were documented monthly and dead oysters – i.e. those with  
179 empty or gaping shells – were removed from the experiment. General disease status was  
180 assessed on subsets of oysters throughout the experiment by histology and *in situ*  
181 hybridisation using an adaptation of available methods (Fabioux et al. 2004; Montagnani et  
182 al. 2001). In addition, the presence of *Bonamia ostreae*, a protozoan parasite that causes a  
183 lethal infection of flat oyster haemocytes (Pichot et al. 1979), was assessed by qPCR following  
184 Robert et al. (2009). The prevalence of *B. ostreae* infections was negligible; hence disease  
185 status had a minor influence on the assessment of growth traits in the experimental  
186 population. After 10 months of growth under field conditions, gill tissue was dissected from  
187 individuals alive at the end of the study and preserved in molecular grade absolute ethanol  
188 (Fisher Scientific) for genetic analysis.

189

## 190 2.2 Phenotypes

191 Four growth-associated traits were measured at three time points over the course of 10  
192 months: total weight (TW, the weight of an individual oyster including the shell), shell length  
193 (SL, the maximum distance between the anterior and posterior margins), shell height (SH, the  
194 maximum distance between the hinge to the furthest edge), and shell width (SW, the  
195 maximum distance at the thickest part of the two shell valves) (Figure 1). Weight was  
196 recorded in grams up to one decimal place. Shell measurements were taken with traceable  
197 digital callipers (Fisher Scientific) with 0.02 mm precision. Oysters were cleaned and defouled  
198 before measurements were taken.

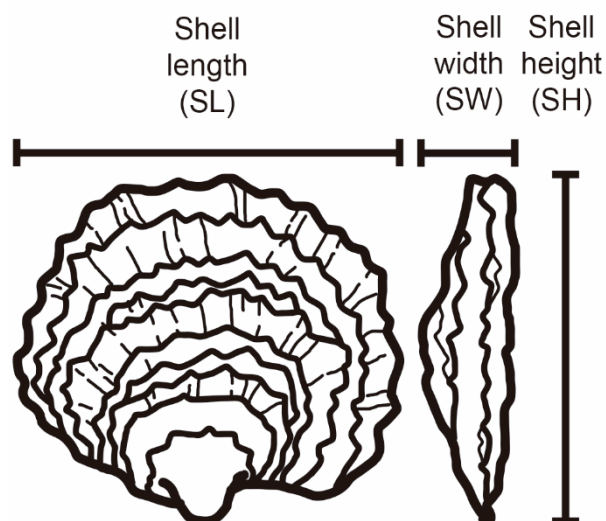

199

200

201 **Figure 1.** Nomenclature of the growth-related morphometric traits measured in this study.

202

### 203 **2.3 DNA extraction**

204 Total DNA was isolated from gill tissue following a CTAB (cetyltrimethylammonium bromide)-  
205 based extraction protocol (details in Gutierrez et al. (2017)). The integrity of the extracted  
206 DNA was assessed by agarose gel electrophoresis, while DNA quality was verified on a  
207 Nanodrop ND-1000 (Thermo Fisher Scientific) spectrophotometer by checking the 260/280  
208 and 260/230 ratios. All samples had 260/280 and 260/230 values  $\geq 1.85$  and  $\geq 1.96$ ,  
209 respectively.

210

### 211 **2.4 SNP genotyping and Quality Control**

212 Whole-genome genotyping of  $\sim 15\text{K}$  SNPs was carried out by IdentiGEN (Dublin, Ireland) using  
213 the combined-species Affymetrix Axiom oyster SNP-array (Gutierrez et al. 2017). Signal  
214 intensity files were imported to the Axiom analysis Suite v4.0.3.3 software for quality control  
215 (QC) assessment and genotype calling. Genotypes were generated using the default  
216 parameter settings for diploid species, resulting in 11,808 SNPs typed for 870 individuals. To  
217 assess the reproducibility of genotype calls, five DNA samples from the same individual were  
218 genotyped independently on three different arrays, and their genotype concordance  
219 evaluated through an identity-by-state (IBS) analysis. The genotype concordance rate among  
220 replicates was 99.7%, demonstrating a high reproducibility of the genotyping assays. The  
221 flanking region of these markers were mapped to the *O. edulis* chromosome-level genome  
222 assembly (Gundappa et al. 2022). Of the 11,808 SNPs, 10,025 had uniquely mapping probes  
223 and were retained for downstream analysis. A total of 1,539 markers (15.4%) were  
224 monomorphic in the population under study. QC was conducted using Plink v2.0 (Chang et al.  
225 2015). SNP variants were retained for further analysis if they had a call rate  $>95\%$  and a minor  
226 allele frequency (MAF)  $>0.05$ . These filters removed 4,391 SNPs (leaving a total of 5,634 SNPs),  
227 of which the majority were filtered out based on the MAF threshold (i.e. were monomorphic  
228 or near-monomorphic in this population). Given that significant sub-clustering was detected  
229 in the data (Figure S2), possibly due to a high variance in the reproductive success of  
230 broodstock parents and/or temporal variation in spawning, a k-means clustering method was  
231 used to assign individuals into groups. Deviations from Hardy-Weinberg Equilibrium (HWE)  
232 were tested separately in each of the three genetic clusters identified by the analysis. SNP  
233 markers showing significant deviations (HWE p-value  $< 1e-10$ ) in two of the three clusters  
234 were excluded from the analysis. Sample QC included removing individual oysters with a  
235 missingness above 5% and high heterozygosity (i.e. more than three median absolute  
236 deviations from median). Finally, a principal component analysis (PCA) was performed using  
237 a set of  $\sim 3.5\text{K}$  SNPs for which no pair of markers within a window of 200 kb had a  $r^2 > 0.5$ . The  
238 top five PCs, which explain 47% of the variance (considering 20 PCs), were fitted in the model  
239 to account for the effect of population structure. The final dataset comprised 840 samples  
240 genotyped at 4,577 genome-wide SNPs.

241

### 242 **2.5 Genetic parameter estimation**

243 Genetic parameters for growth-related traits were estimated by fitting the following  
244 univariate linear mixed model in GEMMA v0.95alpha (Zhou and Stephens 2012):

$$245 \quad (1) \quad y = \mu + Xb + Zu + e$$

246 Where  $\mathbf{y}$  is the vector of observed phenotypes;  $\boldsymbol{\mu}$  is the overall mean of the phenotype in the  
247 population;  $\mathbf{b}$  is the vector of fixed effects to be fitted (the first five principal components  
248 were included as covariates);  $\mathbf{u}$  is the vector of the additive genetic effects;  $\mathbf{X}$  and  $\mathbf{Z}$  are the  
249 corresponding incidence matrices for fixed and additive effects, respectively; and  $\mathbf{e}$  is a vector  
250 of residuals. The following distributions were assumed:  $\mathbf{u} \sim \mathbf{N}(\mathbf{0}, \mathbf{G}\sigma_u^2)$  and  $\mathbf{e} \sim \mathbf{N}(\mathbf{0}, \mathbf{I}\sigma_e^2)$ .  
251 Where  $\sigma_u^2$  and  $\sigma_e^2$  are the additive genetic and residual variance, respectively,  $\mathbf{G}$  is the  
252 genomic relationship matrix and  $\mathbf{I}$  is the identity matrix. The heritability of growth-related  
253 traits was estimated as the ratio of the additive genetic variance to the total phenotypic  
254 variance.

255 Bivariate animal linear models were implemented to estimate the genetic (co)variance  
256 between TW, SL, SH and SW. Each bivariate analysis was fitted with the same top 5 PCs  
257 mentioned above. Subsequently, genetic correlations among traits were measured as the  
258 ratio of the covariance of two traits to the square root of the product of the variance for each  
259 trait. Phenotypic correlations between traits were calculated using the Pearson correlation  
260 coefficient.

261

## 262 **2.6 Genome-wide association study (GWAS)**

263 To identify SNPs in the flat oyster genome correlated with variation in growth-related traits,  
264 a GWAS was performed by implementing the same model described previously in the GEMMA  
265 software. SNPs were considered significant at the genome-wide level if their likelihood ratio  
266 test P-values surpassed a conservative Bonferroni-corrected significance threshold ( $\alpha/4,577$   
267 =  $1.09\text{e-}5$ ). To derive a threshold for chromosome-wide (suggestive) significance,  $\alpha$  was  
268 divided by the average number of SNPs per chromosome ( $\alpha/457 = 1.09\text{e-}4$ ). The single-marker  
269 P-values obtained from GEMMA were plotted against their chromosome location using the R  
270 package qqman v 0.1.4 (Turner 2017). To assess the inflation of the association statistics, the  
271 genomic control coefficient lambda  $\lambda_{GC}$  was calculated following (Devlin and Roeder 1999).  
272 Candidate genes were searched within 100 kb of the most significant SNP loci using BEDOPS  
273 v2.4.26 (Neph et al. 2012).

274

## 275 **2.7 Genomic Prediction**

276 To evaluate the accuracy of genomic selection, a 5-fold cross validation approach - animals  
277 split into training (80%) and validation (20%) sets - was used on a population of 840 oysters  
278 genotyped for 4,577 informative SNP markers. To reduce stochastic effects arising from  
279 individual sampling, each analysis was repeated 10 times. For each replicate, animals were  
280 randomly partitioned into five subsets (each subset contained 168 individuals). TW, SL, SH  
281 and SW phenotypes recorded in individuals allocated to one of the subsets (validation set)  
282 were masked. The breeding values of the validation set were then predicted based on the  
283 information from the remaining four subsets (training sets) using model (1). The model was  
284 fitted using the AIREMLF90 module from BLUPF90. The accuracy of genomic predictions was  
285 calculated as follows:

$$286 \quad Accuracy = \frac{r_{gEBV,y}}{h}$$

287

288 where  $r_{gEBV,y}$  is the correlation between the predicted and the actual phenotypes of the  
289 validation set, while  $h$  is the square root of the heritability of the trait estimated as described  
290 above.

291

## 292 **2.8 Evaluation of the effect of SNP density on genomic predictions**

293 To assess the effect of SNP density on the accuracy of genomic predictions of growth-related  
294 traits, SNP panels of varying sizes were randomly sampled from the final pool of QC-filtered  
295 array markers ( $n = 4,577$  SNPs). Panels of the following densities were evaluated: 4K, 3K, 2K,  
296 1K, 500, 400, 300, 200 and 100 SNPs. To build the lower-density panels, markers were  
297 randomly sampled from the full QC-filtered SNP dataset in proportion to chromosome lengths  
298 using the R package CVrepGPAcalc v1.0 (Tsairidou 2019; Tsairidou et al. 2020). To account for  
299 sampling bias, 10 SNP panels were generated for each of the SNP densities. The average  
300 genomic prediction accuracies of the different low-density panels were compared against the  
301 equivalent accuracy values obtained with the full panel.

302

## 303 **2.9 Data Availability**

304 The phenotype data used in the current study can be found in Mendeley Data,  
305 <https://doi.org/10.17632/sdtjyys7gr.1>.

306

## 307 **3. Results and discussion**

### 308 **3.1 Growth traits and heritability**

309 Improvement of growth rate is typically one of the first traits to be included as a selection  
310 target in breeding programmes across many farmed species. In this study, oyster growth rate  
311 was assessed in a hatchery-derived oyster population that was translocated to a growing site  
312 and monitored for 10 months. The experimental population had a lower genome-wide  
313 heterozygosity ( $H_o=0.27$ ;  $H_e=0.22$ ) compared to the values reported by (Vera et al., 2019)  
314 ( $H_o>0.31$ ) for a diverse set of flat oyster populations genotyped with the same array. An  
315 overall mortality of 14% was observed during the field trial, among which the majority (36%)  
316 occurred during a summer month (July). At the end of the experimental period, the *O. edulis*  
317 population had the following growth means and standard deviations: +15.7 g (SD = 5.8), 50.8  
318 mm (SD = 7.3), 12.9 mm (SD = 2.3) and 45.8 mm (SD = 8.9), for TW, SH, SW, SL, respectively  
319 (Table 1). The phenotypic correlation was found to be the highest ( $r > 0.8$ ) between two pairs  
320 of traits: (i) TW and SH, and (ii) TW and SL (Figure 2).

321

322

323

324

325

326



327 **Table 1.** Summary statistics of the phenotypic data (SD: Standard deviation; CV: coefficient of  
 328 variation).

| Trait        | Unit | Mean | Min  | Max  | SD  | CV (%) |
|--------------|------|------|------|------|-----|--------|
| Total weight | g    | 15.7 | 4.0  | 38.5 | 5.8 | 36.8   |
| Shell height | mm   | 50.8 | 22.9 | 76.1 | 7.3 | 14.4   |
| Shell width  | mm   | 12.9 | 6.5  | 27.7 | 2.3 | 18.2   |
| Shell length | mm   | 45.8 | 22.2 | 94.4 | 8.9 | 19.5   |

329

330

331

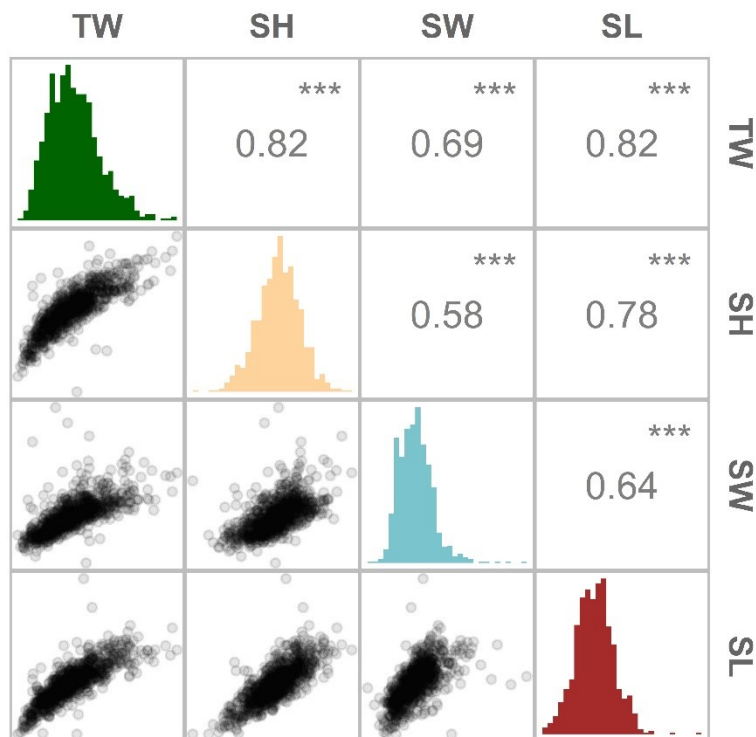

332

333 **Figure 2.** Distribution and magnitude of the phenotypic correlations between growth-related  
 334 traits in *Ostrea edulis*. Pearson's correlation between traits (above the diagonal), histogram  
 335 of trait distribution (diagonal) and scatterplots comparing two traits (below the diagonal). TW  
 336 (total weight), SH (shell height), SW (shell width) and SL (shell length). \*\*\* indicates  $p$ -values  
 337  $< 0.001$ .

338

339

340

341 For the European oyster population under study, the heritability estimates of these growth-  
342 related traits were in the moderate range of 0.22 (for SW) to 0.45 (for TW) (Table 2).  
343 Consistent with similar studies carried out in related oyster species (Xu et al. 2017; Vu et al.  
344 2020), heritability estimates based on SNP markers were higher for total weight than for  
345 growth-related morphometric traits (i.e. shell height, shell width and shell length). The  
346 estimation of heritability for total weight (herein referred to as TW) was similar to those  
347 reported for nine- month-old Portuguese oysters ( $h^2 = 0.45$ ) and a two-year old Pacific oyster  
348 strain ( $h^2 = 0.42$ ) (Vu et al. 2021b; Xu et al. 2017). Total weight, as measured in this study, is  
349 a composite phenotype made up of the animal's shell and soft tissue weights, in addition to  
350 the weight of any pallial fluid - thus is not a direct reflection of meat yield. Nevertheless, in *C.*  
351 *angulata*, a positive genetic correlation (0.63) has been found between TW and soft tissue  
352 weight (Vu et al. 2021b), suggesting that selecting for TW - a trait easier to measure - could  
353 lead to improvements in meat yields. Such indirect improvements of correlated traits have  
354 been reported in a Portuguese oyster line selected only for harvest weight. While the  
355 achieved average selection response for total weight at harvest was 5.8% per generation,  
356 genetic gains were also observed for soft tissue weight, with indirect gains reaching a 1.2%  
357 increase per generation (Vu et al. 2020). For the shell-related traits examined in this study  
358 (SH, SW and SL), heritability estimates were in line with previous studies (Gutierrez et al. 2018;  
359 Yuehuan et al. 2017), and ranged from 0.22 to 0.37. Traditionally, the focus on shell  
360 morphometric traits was to improve oyster growth. Nevertheless, in recent years, oyster shell  
361 shape is increasingly being viewed as an attractive goal for selective breeding due to its  
362 growing importance for consumers (Mizuta and Wikfors 2019). The perceived attractiveness  
363 of an oyster shell can be represented as a secondary trait derived from a ratio between  
364 primary (shell dimension) traits, such as the shell width index (Kube et al. 2011). Given that  
365 significant heritable variation was observed for the three examined morphometric traits,  
366 strategies for homogenizing particular shell shapes may be feasible in *O. edulis*.

367

368

369 **Table 2.** Estimates of heritability ( $h^2$ ) and standard error on the diagonal and pairwise genetic  
370 correlations (below the diagonal) for growth-related traits in a European flat oyster  
371 population.

| Trait        | Total weight       | Shell height       | Shell width        | Shell length       |
|--------------|--------------------|--------------------|--------------------|--------------------|
| Total weight | <b>0.45 (0.06)</b> |                    |                    |                    |
| Shell height | 0.99               | <b>0.37 (0.06)</b> |                    |                    |
| Shell width  | 0.96               | 0.90               | <b>0.22 (0.05)</b> |                    |
| Shell length | 0.95               | 0.93               | 0.88               | <b>0.32 (0.06)</b> |

372

373

374

375

### 376 3.2 Genome-wide association analysis for growth-related traits

377 A GWAS of ~4.5K SNPs passing the filtering criteria were genotyped on 840 oysters with  
378 phenotypic records to gain insight into the genetic basis of growth rate variation in *O. edulis*.  
379 Three of the four examined traits showed association signals surpassing the genome-wide  
380 level of significance (Figure 3). The genomic inflation factor lambda of the GWAS analysis were  
381 close to the desired value ( $\lambda=1$ ) (see Figure S1), indicating that population structure was  
382 adequately accounted for by the model. For TW, the GWAS identified two putative  
383 quantitative trait loci (QTLs) on chromosome 4 associated with the trait. The presence of two  
384 separate QTLs is supported by the low linkage disequilibrium observed between the most  
385 significant SNPs at each locus (pairwise  $r^2 < 0.1$ ). An additional 13 suggestive loci were also  
386 identified, of which nine were located in the vicinity of the two abovementioned genome-  
387 wide hits and four were found on chromosome 1 (Table S1). The SNP showing the strongest  
388 association with TW (AX-169174635) explained 3% of the phenotypic variance. This lead SNP  
389 was also found to be significantly associated with SH and SW. For SL, no SNP reached a  
390 genome-wide significance level, although a few of the same markers showing associations  
391 with TW, SH and SW surpassed the threshold for suggestive significance. The complete  
392 overlap of GWAS hits across the different traits suggests a high degree of shared genetic  
393 control among them, consistent with the high positive genetic correlations observed (Table  
394 2). Overall, the GWAS results indicate that growth-related traits in *O. edulis* are influenced by  
395 many small-effect loci, exhibiting a polygenic architecture, but that two regions on  
396 chromosome 4 may have a moderate effect on these traits.

397 The marker showing the most significant association with TW, SH and SW is located in the  
398 exon of a gene annotated as a *N4BP2* (NEDD4 Binding Protein 2)-like protein (Gene ID:  
399 *FUN\_017843*; Gundappa et al. 2022). The predicted protein product of this gene contains an  
400 AAA domain, hence can bind and hydrolyse ATP (Lupas and Martin 2002). Proteins with these  
401 domains have been shown to be involved in several mechanical cell processes, including  
402 protein folding. Further characterization of this *N4BP2*-like protein would help better  
403 understand the genetic component of growth variation in oysters. Nevertheless, considering  
404 that the candidate allele on *N4BP2* explained a small percentage of the phenotypic variance,  
405 independent oyster populations should first be evaluated to confirm the validity of the  
406 association signal. A second genome-wide significant association – detected only in the TW  
407 GWAS – was located in the exon of an uncharacterized gene (*FUN\_018833*) whose product  
408 shares a high sequence identity (>90%) with similarly uncharacterized proteins in *C. gigas* and  
409 *C. virginica* (NCBI accession numbers XP\_011433755 and XP\_022325737, respectively).  
410 Additional genes within the two genomic regions (+/- 100 kb) showing significant associations  
411 with flat oyster growth traits are shown in Table S2. Given that the SNPs identified in this  
412 study had a small effect on the traits in question, GS would be an effective approach for  
413 increasing genetic gains from selection.

414

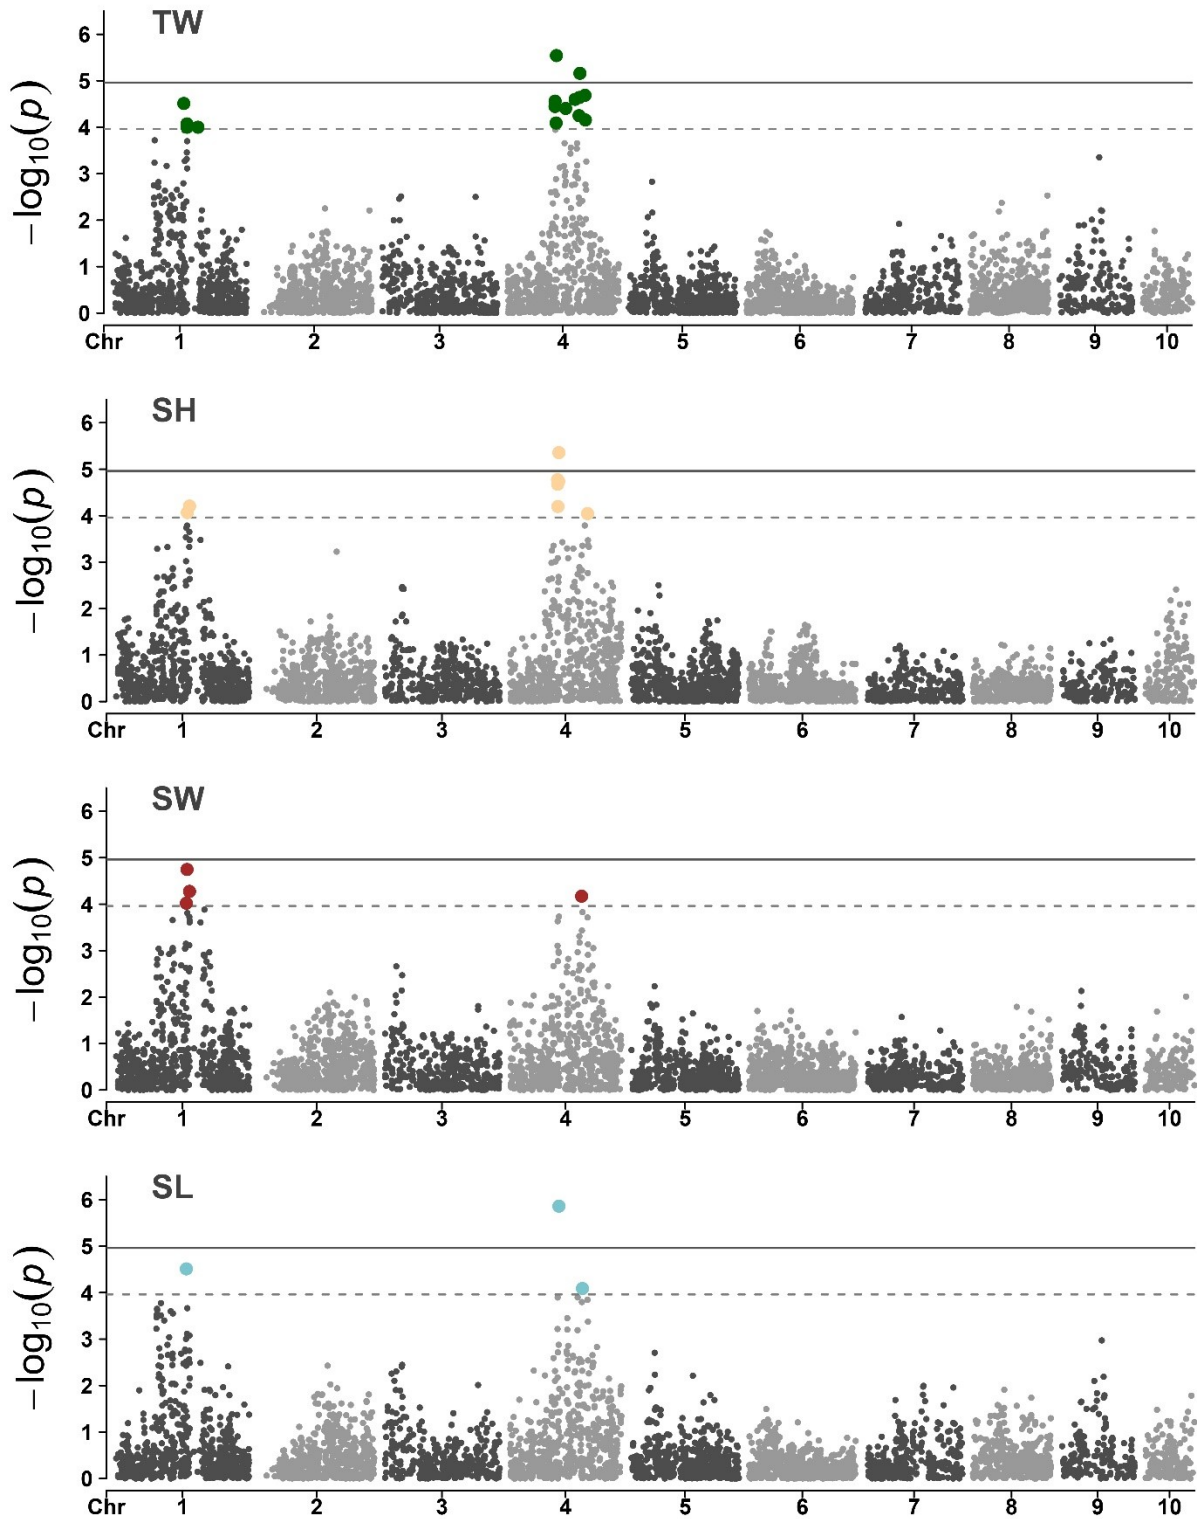

415

416 **Figure 3.** Manhattan plots of the GWAS for growth-related traits in a European flat oyster  
417 population. Solid lines indicates the threshold value for genome-wide significance. Dashed  
418 lines indicate the threshold for a suggestive (chromosome-level) significance.

419

420

### 421 3.3 Genomic selection

422 The incorporation of genetic markers into breeding programmes requires a previous  
423 understanding of the genetic architecture of the targeted trait(s). In the *O. edulis* population  
424 under study, the genetic contribution to the observed variation in growth-related traits was  
425 largely polygenic in nature. For the improvement of polygenic traits, genomic selection has  
426 been shown to be superior to alternative marker-aided selection due to genome-wide  
427 markers capturing a higher proportion of the genetic variation in a trait compared to  
428 individual QTL-targeted markers. Consequently, by means of applying GS, higher predictions  
429 have been achieved for several production traits in a wide range of commercially important  
430 aquaculture species (reviewed in Houston et al. (2020)). Despite GS not yet being widely  
431 operational in oyster breeding programmes (Boudry et al. 2021), studies have demonstrated  
432 the potential of incorporating genome-wide information into selection schemes in these taxa.  
433 In the Pacific oyster, Gutierrez et al. (2018) showed that prediction accuracies for growth-  
434 traits increased 25-30% when the genetic merit of individuals was estimated from SNP  
435 markers using the Genomic Best Linear Unbiased Prediction (GBLUP) model (VanRaden 2008)  
436 compared to a classical pedigree-based approach (PBLUP). Similar results were reported in  
437 the Portuguese oyster, as prediction accuracies increased 7-42% for growth-related traits  
438 when EBVs obtained by GBLUP were compared to those obtained by PBLUP (Vu et al. 2021a).  
439 Since the flat oyster population under study derived from a mass-spawning event, the  
440 pedigree structure was unknown. Therefore, comparisons between pedigree and genome  
441 based methods for estimating breeding values (e.g. GBLUP and Bayesian approaches) could  
442 not be performed.

443 One of the major barriers of implementing GS is the high number of markers required to  
444 accurately predict EBVs and the cost of genotyping these markers (Goddard and Hayes 2007).  
445 Therefore, the design of a strategy to reduce the cost of genotyping is critical for the extensive  
446 adoption of genomic prediction approaches in aquaculture breeding programmes. One such  
447 strategy involves genotyping the minimum number of markers required to achieve maximal  
448 accuracy, which by definition is equal to that obtained with a full panel of markers. As shown  
449 by Kriaridou et al. (2020) for different aquaculture species, the use of low-density SNP panels  
450 has the potential to achieve similar EBV accuracies as when using medium density genotype  
451 datasets of around 7-14K SNPs. The authors estimated that only 1,000 to 2,000 SNPs are  
452 required to achieve maximal accuracy. These results were shown to be consistent across a  
453 range of traits (e.g. disease resistance, growth) and species (e.g. Pacific oyster, Atlantic  
454 salmon) showing robustness to differences in family structure, genotyping approach, trait  
455 heritability and the underlying genetic architecture. In agreement with these findings,  
456 maximal accuracy was attained herein for all the assessed growth-related traits at a minimum  
457 density of 2K SNPs, with only a slight decline in accuracy observed at the lower densities  
458 evaluated (Figure 4A). Consequently, a reduction in the costs of applying GS for improving  
459 growth traits in *O. edulis* can be achieved by means of exploiting low-density SNP panels.  
460 Although low-density panels might not accurately capture the genetic resemblance among  
461 individuals within a population, and therefore show reduced genetic variance estimations and  
462 EBV predictions when compared with high density panels, their use has been widely  
463 evaluated and suggested for different aquaculture species and traits. Furthermore, studies  
464 have shown that low-density panels can achieve higher accuracies than the classical pedigree-  
465 based approach, being a feasible alternative to identify candidates with the highest genetic  
466 merit. For example, in rainbow trout (*Oncorhynchus mykiss*) Vallejo et al. (2018) showed that

467 at least 200 SNPs could exceed PBLUP accuracies for bacterial cold water disease resistance.  
468 Whilst Al-Tobasei et al. (2021) found a similar trend when using between 500-1000 SNPs for  
469 fillet yield traits. To date, the utilization of low-density panels to decrease the cost of genomic  
470 evaluations has also been tested in several aquaculture species, including Atlantic salmon  
471 (*Salmo salar*) (Correa et al. 2017; Tsai et al. 2016), rainbow trout (Yoshida et al. 2018; Al-  
472 Tobasei et al. 2021), and Nile tilapia (*Oreochromis niloticus*) (Barría et al. 2021; Yoshida et al.  
473 2019), suggesting that the development of cost-effective strategies for applying GS will be key  
474 for shaping modern aquaculture breeding programs.

475

**A**

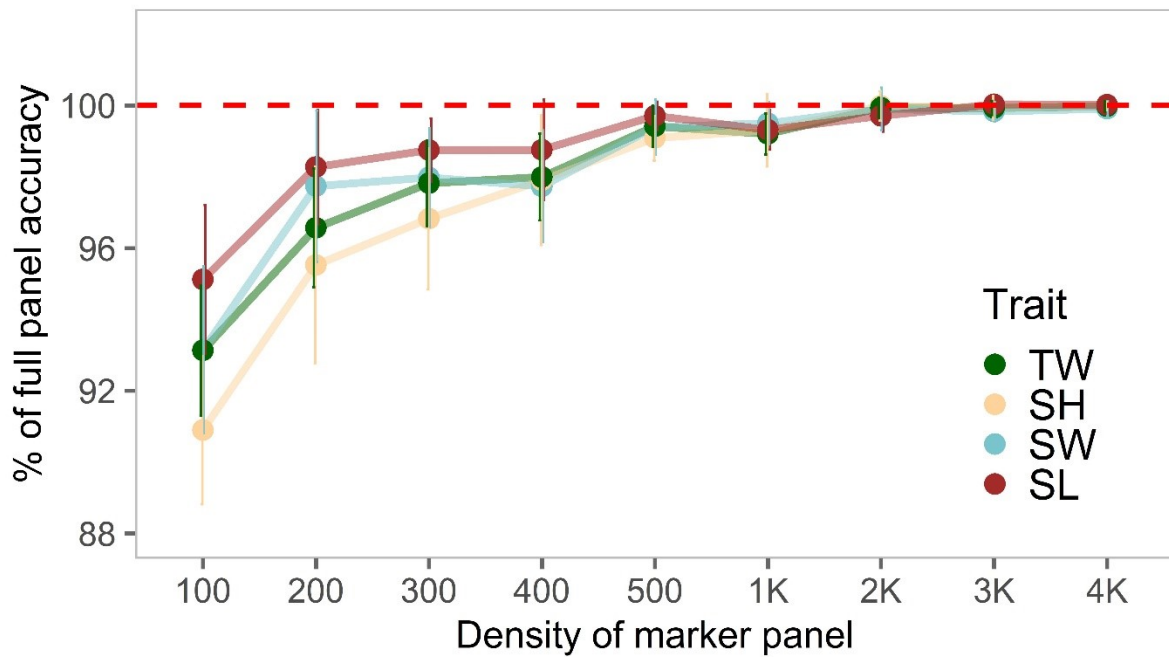

**B**

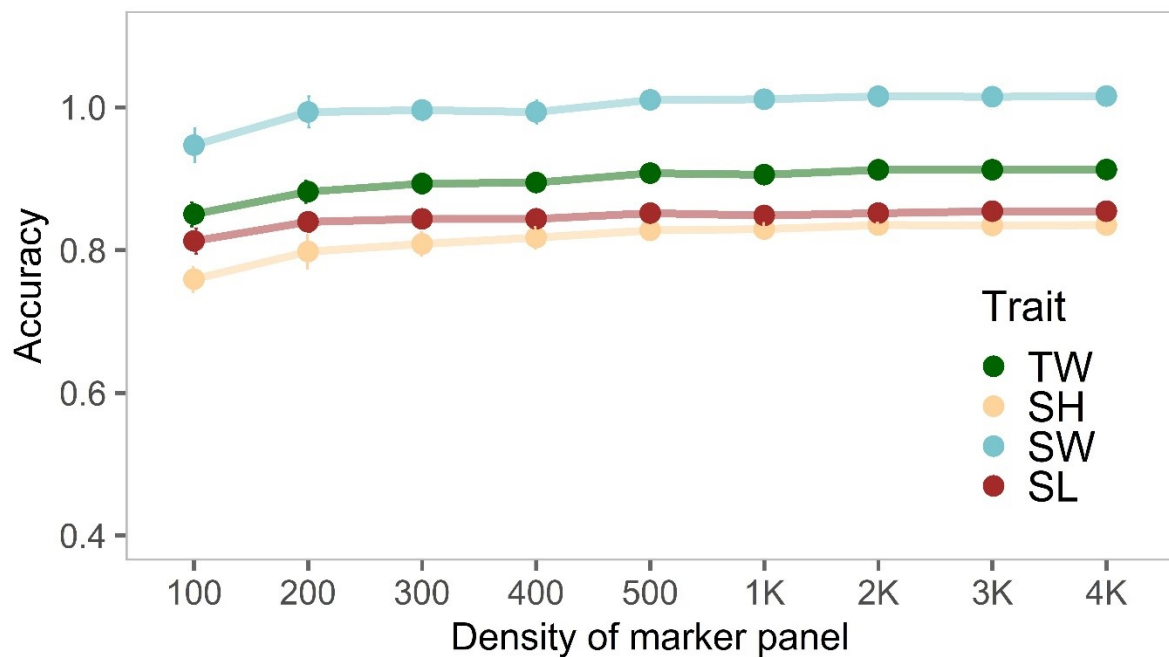

476

477 **Figure 4.** Evaluation of the effect of SNP density on genomic predictions of growth related  
478 traits in a European flat oyster population. (A) Percentage of the maximum genomic  
479 prediction accuracy achieved using different lower density SNP panels. Values were  
480 calculated by dividing the mean accuracy (averaged over ten replicates) estimated at each  
481 nominal SNP density by the accuracy obtained using the full SNP dataset. (B) Average genomic  
482 prediction accuracy values obtained for oyster growth traits at different panel densities.

483

484 Although our results highlight the possibility of reducing the genotyping costs associated with  
485 genomic prediction approaches, caution should be taken as even for the smallest marker  
486 density (i.e. 100 SNPs), prediction accuracies (averaged over 10 replicates) were high and  
487 close to the value obtained with the full marker panel. By using only 100 SNPs the estimated  
488 decrease in the accuracy of genomic breeding values (GEBVs) was of 5% for SL, 7% for TW and  
489 SW, and 10% for SH (Figure 4A). These values highly exceed those reported in the literature  
490 for aquaculture species, where reductions >20% were estimated for panels with 100 SNPs  
491 compared to a complete dataset (Kriaridou et al. 2020). The relative stability of GEBVs  
492 observed across different marker densities (Figure 4B) is likely explained by the underlying  
493 genetic structure of the dataset. For this study, 40 potential parents were placed in the same  
494 tank and spawned during successive events. The genetic analysis of the progeny revealed that  
495 the population was dominated (70% of the sample size; n=589) by a group of highly related  
496 individuals (Figures S2-S3), suggesting there was a large variance in reproductive success  
497 among breeders, as previously reported in mass spawning of oysters (Lallias et al. 2010). In  
498 the context of GS, the inclusion of highly related animals in the training and validation sets  
499 results in only a small number of markers being required to capture the haplotype effects, as  
500 related animals share longer haplotypes (Hickey et al. 2014). The fact that in the current study  
501 animals grouped in the reference and validation data sets were highly related would have  
502 likely increased the accuracy of predicted gEBV, even when animals are genotyped at low  
503 density, as also shown by Fraslin et al. (2022) in Atlantic salmon. Moreover, since the high  
504 accuracies predicted in the flat oyster population could have also been affected by factors  
505 such as a low effective population size (Lee et al., 2017) and the observed structure (Werner  
506 et al. 2020), additional populations with different genetic background should be assessed to  
507 obtain estimates to be expected in practical breeding programs. Future work focused on  
508 evaluating the extent to which low-density panels and alternative strategies (e.g. genotype  
509 imputation) can be used to reduce genotyping costs will be key for the cost-effective  
510 exploitation of GS by oyster breeding programmes.

511

#### 512 **4. Conclusion**

513 Growth-related traits in *O. edulis* had moderate-low heritability estimates, ranging from 0.22  
514 (for SW) to 0.45 (for TW). High genetic correlations were identified between all traits (>0.9);  
515 hence, TW - a trait easier to measure - can potentially be used as a proxy phenotype for  
516 improving the three examined morphometric traits (SH, SW and SL). The GWAS results  
517 revealed that growth traits were largely polygenic, but with two distinct QTLs on chromosome  
518 4 reaching genome-wide significance. Prediction accuracies were high for all traits (>0.83),  
519 with minimal differences observed when comparing estimates obtained using different  
520 marker densities. Altogether, these results suggest that the high prediction accuracies found  
521 in this study could have been influenced by the uneven family structure of the experimental  
522 population. Although low-density SNP panels appear as a promising cost-effective GS  
523 strategy, additional populations with different degrees of genetic relationship should be  
524 assessed to derive estimates of prediction accuracies to be expected in practical breeding  
525 programmes in oysters.

526

527



## 528 5. Acknowledgments

529 The authors acknowledge funding from the Biotechnology and Biological Sciences Research  
530 Council (BBSRC), including Institute Strategic Programme grants (BBS/E/D/20002172,  
531 BBS/E/D/30002275 and BBS/E/D/10002070), a grant within the AquaLeap project  
532 (BB/S004181/1), funding from Blue Marine Foundation and National Fish and Wildlife  
533 Foundation (NFWF). The authors would also like to acknowledge MDL Port Hamble Marina for  
534 allowing positioning of oyster cages within the Marina, and thank Eric Harris-Scott, Matthew  
535 Sanders, Monica Fabra, Tim Regan and Zenaba Khatir for their invaluable help with setup and  
536 sampling of the field experiment.

537

## 538 6. References

- 539 Al-Tobasei, R., Ali, A., Garcia, A.L.S., Lourenco, D., Leeds, T., and Salem, M. (2021). Genomic  
540 predictions for fillet yield and firmness in rainbow trout using reduced-density SNP panels.  
541 *BMC Genom.* 22:92. doi: 10.1186/s12864-021-07404-9.
- 542 Allen, S.K., Gaffney, P.M., and Ewart, J.W. (1993). Genetic Improvement of the Eastern Oyster for  
543 Growth and Disease Resistance in the Northeast. *Northeastern Regional Aquaculture Center.*  
544 210
- 545 Barría, A., Benzie, J.A.H., Houston, R.D., De Koning, D.J., and de Verdal, H. (2021). Genomic Selection  
546 and Genome-wide Association Study for Feed-Efficiency Traits in a Farmed Nile Tilapia  
547 (*Oreochromis niloticus*) Population. *Front. Genet.* 12: 737906. doi:  
548 10.3389/fgene.2021.737906.
- 549 Botta, R., Asche, F., Borsum, J.S., and Camp, E.V. (2020). A review of global oyster aquaculture  
550 production and consumption. *Mar. Policy* 117:103952. doi: 10.1016/j.marpol.2020.103952.
- 551 Boudry, P., Allal, F., Aslam, M.L., Bargelloni, L., Bean, T.P., Brard- Fudulea, S., et al. (2021). Current  
552 status and potential of genomic selection to improve selective breeding in the main  
553 aquaculture species of International Council for the Exploration of the Sea (ICES) member  
554 countries. *Aquac.* 20:100700. doi: 10.1016/j.aqrep.2021.100700.
- 555 Boutet, I., Alves Monteiro, H.J., Takeuchi T, Bonnivard, E., Farhat, S., Riso, R., Salaun, B., Andersen,  
556 A., Toullec, J.-Y., Lallier, F., Flot, J.F., Guiglielmoni, N., Guo, X., Allam, B., Espinoza E.,  
557 Marbouty, M., Koszul, R., and Tanguy, A. (2022) Chromosomal assembly of the flat oyster  
558 (*Ostrea edulis* L.) genome as a new genetic resource for aquaculture. Evolutionary  
559 applications. XX-XX-XX
- 560 Camara, M.D., Yen, S., Kaspar, H.F., Kesarcodi-Watson, A., King, N., Jeffs, A.G., et al. (2017).  
561 Assessment of heat shock and laboratory virus challenges to selectively breed for ostreid  
562 herpesvirus 1 (OsHV-1) resistance in the Pacific oyster, *Crassostrea gigas*. *Aquaculture* 469,  
563 50-58. doi: 10.1016/j.aquaculture.2016.11.031.
- 564 Chang, C.C., Chow, C.C., Tellier, L.C., Vattikuti, S., Purcell, S.M., and Lee, J.J. (2015). Second-  
565 generation PLINK: rising to the challenge of larger and richer datasets. *GigaScience* 4:7. doi:  
566 10.1186/s13742-015-0047-8.
- 567 Colsoul, B., Boudry, P., Pérez-Parallé, M.L., Bratoš Cetinić, A., Hugh-Jones, T., Arzul, I., et al. (2021).  
568 Sustainable large-scale production of European flat oyster (*Ostrea edulis*) seed for ecological  
569 restoration and aquaculture: a review. *Rev. Aquac.* 13, 423-1468. doi: 10.1111/raq.12529.
- 570 Correa, K., Bangera, R., Figueroa, R., Lhorente, J.P, and Yáñez, J.M. (2017). The use of genomic  
571 information increases the accuracy of breeding value predictions for sea louse (*Caligus*  
572 *rogercresseyi*) resistance in Atlantic salmon (*Salmo salar*). *Genet. Sel. Evol.* 49:15. doi:  
573 10.1186/s12711-017-0291-8.

- 574 Culloty, S.C., Cronin, M.A., and Mulcahy, M.F. (2004). Potential resistance of a number of  
575 populations of the oyster *Ostrea edulis* to the parasite *Bonamia ostreae*. *Aquaculture* 237,  
576 41-58. doi: 10.1016/j.aquaculture.2004.04.007.
- 577 De Melo, C.M., Durland, E., and Langdon, C. (2016). Improvements in desirable traits of the Pacific  
578 oyster, *Crassostrea gigas*, as a result of five generations of selection on the West Coast, USA.  
579 *Aquaculture* 460, 105- 115. doi: 10.1016/j.aquaculture.2016.04.017.
- 580 Dégremont, L., Nourry, M., and Maurouard, E. (2015). Mass selection for survival and resistance to  
581 OsHV-1 infection in *Crassostrea gigas* spat in field conditions: response to selection after  
582 four generations. *Aquaculture* 446, 111-121. doi: 10.1016/j.aquaculture.2015.04.029.
- 583 Devlin, B., and Roeder, K. (1999). Genomic control for association studies. *Biometrics* 55, 997-1004.  
584 doi: 10.1111/j.0006-341x.1999.00997.x.
- 585 Evans, F., Matson, S., Brake, J., and Langdon, C. (2004). The effects of inbreeding on performance  
586 traits of adult Pacific oysters (*Crassostrea gigas*). *Aquaculture* 230, 89-98. doi:  
587 10.1016/j.aquaculture.2003.09.023.
- 588 Evans, S., and Langdon, C. (2006). Effects of genotype × environment interactions on the selection of  
589 broadly adapted Pacific oysters (*Crassostrea gigas*). *Aquaculture* 261, 522-534. doi:  
590 10.1016/j.aquaculture.2006.07.022.
- 591 Fabioux, C., Huvet, A., Lelong, C., Robert, R., Pouvreau, S., Daniel, J.Y., et al. (2004). Oyster vasa-like  
592 gene as a marker of the germline cell development in *Crassostrea gigas*. *Biochem. Biophys.*  
593 *Res. Commun.* 320, 592-598. doi: 10.1016/j.bbrc.2004.06.009.
- 594 FAO (2019). Cultured Aquatic Species Information Programme. *Ostrea edulis*, edited by F.F. Division.  
595 Fitzter, S.C., McGill, R.A.R., Torres Gabarda, S., Hughes, B., Dove, M., O'Connor, W., et al. (2019).  
596 Selectively bred oysters can alter their biomineralization pathways, promoting resilience to  
597 environmental acidification. *Glob. Chang. Biol.* 25, 4105-4115. doi: 10.1111/gcb.14818.
- 598 Fraslin, C., Yáñez, J.M., Robledo, D., and Houston, R.D. (2022). The impact of genetic relationship  
599 between training and validation populations on genomic prediction accuracy in Atlantic  
600 salmon. *Aquaculture Reports* 23, 101033. doi: doi.org/10.1016/j.aqrep.2022.101033.
- 601 Goddard, M.E., and Hayes, B.J. (2007). Genomic selection. *J. Anim. Breed. Genet.* 124, 323-330. doi:  
602 10.1111/j.1439-0388.2007.00702.x.
- 603 Grizel, H., and Héral, M. (1991). Introduction into France of the Japanese oyster (*Crassostrea gigas*).  
604 *ICES Mar. Sci. Symp.* 47, 399- 403. doi: 10.1093/icesjms/47.3.399.
- 605 Grizzle, R.E., Ward, K.M., Peter, C.R., Cantwell, M., Katz, D., and Suvillan, J. (2017). Growth,  
606 morphometrics, and nutrient content of farmed eastern oysters, *Crassostrea virginica*  
607 (Gmelin), in New Hampshire, USA. *Aquac. Res.* 48, 1525-1537. doi: 10.1111/are.12988.
- 608 Gundappa, M. K., Peñaloza, C., Regan, T., Boutet, I., Tanguy, A., Houston, R. D., Bean, T. B., &  
609 Macqueen, D. J. (2022). A chromosome level reference genome for European flat oyster  
610 (*Ostrea edulis* L.). Evolutionary applications. XX-XX-XX
- 611 Gutierrez, A.P., Matika, O., Bean, T.P., and Houston, R.D. (2018). Genomic Selection for Growth  
612 Traits in Pacific Oyster (*Crassostrea gigas*): Potential of Low-Density Marker Panels for  
613 Breeding Value Prediction. *Front. Genet.* 9:391. doi: 10.3389/fgene.2018.00391.
- 614 Gutierrez, A.P., Symonds, J., King, N., Steiner, K., Bean, T.P., and Houston, R.D. (2020). Potential of  
615 genomic selection for improvement of resistance to ostreid herpesvirus in Pacific oyster  
616 (*Crassostrea gigas*). *Anim. Genet.* 51, 249-257. doi: 10.1111./age.12909.
- 617 Gutierrez, A.P., Turner, F., Gharbi, K., Talbot, R., Lowe, N.R., Peñaloza, C., et al. (2017). Development  
618 of a Medium Density Combined-Species SNP Array for Pacific and European Oysters  
619 (*Crassostrea gigas* and *Ostrea edulis*). *G3(Bethesda)* 7, 2209-2218. doi:  
620 10.1534/g3.117.041780.
- 621 He, X., Li, C., Qi, H., Meng, J., Wang, W., Wu, F., et al. (2021). A genome-wide association study to  
622 identify the genes associated with shell growth and shape-related traits in *Crassostrea gigas*.  
623 *Aquaculture* 543:736926. doi: 10.1016/j.aquaculture.2021.736926.

- 624 He, X., Wu, F., Qi, H., Meng, J., Wang, W., Liu, M., et al. (2022). Whole-genome resequencing reveals  
625 the single nucleotide polymorphisms associated with shell shape in *Crassostrea gigas*.  
626 *Aquaculture* 547:737502. doi: 10.1016/j.aquaculture.2021.737502.
- 627 Helmer, L., Farrell, P., Hendy, I., Harding, S., Robertson, M., and Preston, J. (2019). Active  
628 management is required to turn the tide for depleted *Ostrea edulis* stocks from the effects  
629 of overfishing, disease and invasive species. *PeerJ* 7:e6431. doi: 10.7717/peerj.6431.
- 630 Hickey, J.M., Dreisigacker, S., Crossa, J., Hearne, S., Babu, R., Prasanna, B.M., et al. (2014). Evaluation  
631 of Genomic Selection Training Population Designs and Genotyping Strategies in Plant  
632 Breeding Programs Using Simulation. *Crop Sci.* 54, 1476-1488. doi:  
633 10.2135/cropsci2013.03.0195.
- 634 Houston, R.D., Bean, T.P., Macqueen, D.J., Gundappa, M.K., Jin, Y.H., Jenkins, T.L., et al. (2020).  
635 Harnessing genomics to fast-track genetic improvement in aquaculture. *Nat. Rev. Genet.* 21:  
636 389-409. doi: 10.1038/s41576-020-0227-y.
- 637 Jones, D.B., Jerry, D.R., Khatkar, M.S., Moser, G., Raadsma, H.W., Taylor J.J., et al. (2014).  
638 Determining genetic contributions to host oyster shell growth: Quantitative trait loci and  
639 genetic association analysis for the silver-lipped pearl oyster, *Pinctada maxima*. *Aquaculture*  
640 434, 367-375. doi: 10.1016/j.aquaculture.2014.08.040.
- 641 Jones, D.B., Jerry, D.R., Khatkar, M.S., Raadsma, H.W., and Zenger, K.R. (2013). A high-density SNP  
642 genetic linkage map for the silver-lipped pearl oyster, *Pinctada maxima*: a valuable resource  
643 for gene localisation and marker-assisted selection. *BMC Genom.* 14:810. doi: 10.1186/1471-  
644 2164-14-810.
- 645 Korrynga, P. (1976). Farming the flat oyster of the genus *Ostrea*. Amsterdam: ElsevierScientific.
- 646 Kriaridou, C., Tsairidou, S., Houston, R.D., and Robledo, D. (2020). Genomic Prediction Using Low  
647 Density Marker Panels in Aquaculture: Performance Across Species, Traits, and Genotyping  
648 Platforms. *Front Genet.* 11:124. doi: 10.3389/fgene.2020.00124.
- 649 Kube, P., Cunningham, M., Dominik, S., Parkinson, S., Finn, B., Henshall, J., et al. (2011).  
650 Enhancement of the Pacific Oyster Selective Breeding Program. Australia: FRDC and Seafood  
651 CRC.
- 652 Lallias, D., Taris, N., Boudry, P., Bonhomme, F., and Lapègue, S. (2010). Variance in the reproductive  
653 success of flat oyster *Ostrea edulis* L. assessed by parentage analyses in natural and  
654 experimental conditions. *Genet. Res.* 92, 175-187. doi: 10.1017/S0016672310000248
- 655 Lapegue, S., Harrang, E., Heurtebise, S., Flahauw, E., Donnadiou, C., Gayral, P., et al. (2014).  
656 Development of SNP-genotyping arrays in two shellfish species. *Mol. Ecol. Resour.* 14, 820-  
657 830. doi: 10.1111/1755-0998.12230.
- 658 Lee, S.H., Clark, S., and van der Werf, J.H.J. (2017). Estimation of genomic prediction accuracy from  
659 reference populations with varying degrees of relationship. *PLoS One* 12(12), e0189775. doi:  
660 10.1371/journal.pone.0189775.
- 661 Li, A., Dai, H., Guo, X., Zhang, Z., Zhang, K., Wang, C., et al. (2021). Genome of the estuarine oyster  
662 provides insights into climate impact and adaptive plasticity. *Commun. Biol.* 4:1287. doi:  
663 10.1038/s42003-021-02823-6.
- 664 Li, C., Wang, J., Song, K., Meng, J., Xu, F., Li, L., et al. (2018). Construction of a high-density genetic  
665 map and fine QTL mapping for growth and nutritional traits of *Crassostrea gigas*. *BMC*  
666 *Genom.* 19:626. doi: 10.1186/s12864-018-4996-z.
- 667 Lillehammer, M., Banger, R., Salazar, M., Vela, S., Erazo, E.C., Suarez, A., et al. (2020). Genomic  
668 selection for white spot syndrome virus resistance in whiteleg shrimp boosts survival under  
669 an experimental challenge test. *Sci. Rep.* 10:20571. doi: 10.1038/s41598-020-77580-3.
- 670 Liu, S., Li, L., Zhang, S., Wang, W., Yang, J., and Zhang, G. (2019). Heritability estimates for nutritional  
671 quality-related traits of the Pacific oyster, *Crassostrea gigas*. *J. World Aquacult. Soc.* 50, 738-  
672 748. doi: 10.1111/jwas.12588.
- 673 Lupas, A.N., and Martin, J. (2002). AAA proteins. *Curr. Opin. Struct. Biol.* 12, 746-753. doi:  
674 10.1016/s0959-440x(02)00388-3.

- 675 McCarty, A.J., Allen, Jr., S.K., and Plough, L.V. (2022). Genome-wide analysis of acute low salinity  
676 tolerance in the eastern oyster *Crassostrea virginica* and potential of genomic selection for  
677 trait improvement. *G3 (Bethesda)* 12:jkab368. doi: 10.1093/g3journal/jkab368.
- 678 Meng, J., Song, K, Li, C., Liu, S., Shi, R., Li, B., et al. (2019). Genome-wide association analysis of  
679 nutrient traits in the oyster *Crassostrea gigas*: genetic effect and interaction network. *BMC*  
680 *Genom.* 20:625. doi: 10.1186/s12864-019-5971-z.
- 681 Meuwissen, T.H., Hayes, B.J., and Goddard, M.E. (2001). Prediction of total genetic value using  
682 genome-wide dense marker maps. *Genetics* 157, 1819-1829. doi:  
683 10.1093/genetics/157.4.1819.
- 684 Mizuta, D.D., and Wikfors, G.H. (2019). Seeking the perfect oyster shell: a brief review of current  
685 knowledge. *Rev. Aquac.* 11, 586-602. doi: 10.1111/raq.12247.
- 686 Modak, T.H., Literman, R., Puritz, J.B., Johnson, K.M., Roberts, E.M., Proestou, D., et al. (2021).  
687 Extensive genome-wide duplications in the eastern oyster (*Crassostrea virginica*). *Philos.*  
688 *Trans. R. Soc. Lond., B, Biol. Sci.* 376:20200164. doi: 10.1098/rstb.2020.0164.
- 689 Montagnani, C., Le Roux, F., Berthe, F., and Escoubas, J.M. (2001). Cg-TIMP, an inducible tissue  
690 inhibitor of metalloproteinase from the Pacific oyster *Crassostrea gigas* with a potential role  
691 in wound healing and defense mechanisms(1). *FEBS Lett.* 500, 64-70. doi: 10.1016/s0014-  
692 5793(01)02559-5.
- 693 Naciri-Graven, Y., Martin, A.G., Baud, J.P., Renault, T., and Gérard, A. (1998). Selecting the flat oyster  
694 *Ostrea edulis* (L.) for survival when infected with the parasite *Bonamia ostreae*. *J. Exp. Mar.*  
695 *Biol. Ecol.* 224, 91-107. doi: 10.1016/S0022-0981(97)00171-8.
- 696 Neph, S., Kuehn, M.S., Reynolds, A.P., Haugen, E., Thurman, R.E., Johnson A.K., et al. (2012). BEDOPS:  
697 high-performance genomic feature operations. *Bioinformatics* 28, 1919-1920. doi:  
698 10.1093/bioinformatics/bts277.
- 699 Newkirk, G.F., and Haley, L.E. (1982). Progress in Selection for Growth Rate in the European Oyster  
700 *Ostrea edulis*. *Marine Ecology Progress Series* 10, 3.
- 701 Newkirk, G.F., and Haley, L.E. (1983). Selection for growth rate in the European oyster, *Ostrea edulis*:  
702 Response of second generation groups. *Aquaculture* 33, 149-155. doi: 10.1016/0044-  
703 8486(83)90396-4.
- 704 Oelig, and G. Uf, (2000). Present Status of the French Aquaculture. *Aquaculture Science* 48 (2):243-  
705 248.
- 706 Peñaloza, C., Gutierrez, A.P., Eöry, L., Wang, S., Guo, X., Archibald, A.L., et al. (2021). A chromosome-  
707 level genome assembly for the Pacific oyster *Crassostrea gigas*. *GigaScience* 10:giab020. doi:  
708 10.1093/gigascience/giab020.
- 709 Pichot, Y., Comps, M., Tige, G., Grizel, H., and Rabouin, M.A. (1979). Recherches sur *Bonamia ostreae*  
710 gen. n., sp. n., parasite nouveau de l' huitre plate *Ostrea edulis* L. [France]. *Rev. Trav. Inst.*  
711 *Peches Marit.* 43, 131-140.
- 712 Plough, L.V. (2016). Genetic load in marine animals: a review. *Curr. Zool.* 62, 567-579. doi:  
713 10.1093/cz/zow096.
- 714 Pogoda, B. (2019). Current Status of European Oyster Decline and Restoration in Germany.  
715 *Humanities* 8:9. doi: 10.3390/h8010009.
- 716 Pogoda, B., Boudry, P., Bromley, C., Cameron, T.C., Colsoul, B., Donnan, D.W., et al. (2020). NORA  
717 moving forward: Developing an oyster restoration network in Europe to support the Berlin  
718 Oyster Recommendation. *Aquat. Conserv.* 30, 2031-2037. doi: 10.1002/aqr.3447.
- 719 Preston, J., Fabra, M., Helmer, L., Johnson, E., Harris-Scott, E., and Wendy, I.W. (2020). Interactions  
720 of larval dynamics and substrate preference have ecological significance for benthic  
721 biodiversity and *Ostrea edulis* Linnaeus, 1758 in the presence of *Crepidula fornicata*. *Aquat.*  
722 *Conserv.: Mar. Freshw. Ecosyst.* 30, 2133-2149. doi: 10.1002/aqc.3446
- 723 Proestou, D.A., Vinyard, B.T., Corbett, R.J., Piesz, J., Allen, S.K., Small J.M., et al. (2016). Performance  
724 of selectively-bred lines of eastern oyster, *Crassostrea virginica*, across eastern US estuaries.  
725 *Aquaculture* 464:17-27. doi: 10.1016/j.aquaculture.2016.06.012.

- 726 Qi, H., Li, L., and Zhang, G. (2021). Construction of a chromosome-level genome and variation map  
727 for the Pacific oyster *Crassostrea gigas*. *Mol. Ecol. Resour.* 21, 1670-1685. doi:  
728 10.1111/1755-0998.13368.
- 729 Qi, H., Song, K., Li, C., Wang, W., Li, B., Li, L., et al. (2017). Construction and evaluation of a high-  
730 density SNP array for the Pacific oyster (*Crassostrea gigas*). *PLoS One* 12:e0174007. doi:  
731 10.1371/journal.pone.0174007.
- 732 Ragone Calvo, L.M., Calvo, G.W., and Burreson, E.M. (2003). Dual disease resistance in a selectively  
733 bred eastern oyster, *Crassostrea virginica*, strain tested in Chesapeake Bay. *Aquaculture* 220,  
734 69-87. doi: 10.1016/S0044-8486(02)00399-X.
- 735 Renault, T., Cochenec, N., and Grizel, H. (1995). *Bonamia ostreae*, parasite of the European flat  
736 oyster, *Ostrea edulis*, does not experimentally infect the Japanese oyster, *Crassostrea gigas*.  
737 *Bull. Eur. Ass. Fish Pathol.* 15:78.
- 738 Robert, M., Garcia, C., Chollet, B., Lopez-Flores, I., Ferrand, S., François, C., et al. (2009). Molecular  
739 detection and quantification of the protozoan *Bonamia ostreae* in the flat oyster, *Ostrea*  
740 *edulis*. *Mol. Cell. Probes* 23, 264-271. doi: 10.1016/j.mcp.2009.06.002.
- 741 Robert, R., Borel, M., Pichot, Y., and Trut, G. (1991). Growth and mortality of the European oyster  
742 *Ostrea edulis* in the Bay of Arcachon (France). *Aquat. Living Resour.* 4, 265-274. doi:  
743 10.1051/alr:1991028.
- 744 Sas, H., Deden, B., Kamermans, P., zu Ermgassen, P.S.E., Pogoda B., Preston, J., et al. (2020). *Bonamia*  
745 infection in native oysters (*Ostrea edulis*) in relation to European restoration projects. *Aquat.*  
746 *Conserv.: Mar. Freshw. Ecosyst.* 30, 2150-2162. doi: 10.1002/aqc.3430.
- 747 Thurstan, R.H., Hawkins, J.P., Raby, L., and Roberts, C.M. (2013). Oyster (*Ostrea edulis*) extirpation  
748 and ecosystem transformation in the Firth of Forth, Scotland. *J. Nat. Conserv.* 21, 253-261.  
749 doi: 10.1016/j.jnc.2013.01.004.
- 750 Toro, J.E., and Newkirk, G.F. (1990). Divergent selection for growth rate in the European oyster  
751 *Ostrea edulis*: response to selection and estimation of genetic parameters. *Mar. Ecol. Prog.*  
752 *Ser.* 62, 219-227. doi: 10.3354/meps062219.
- 753 Tsai, H.Y., Hamilton, A., Tinch, A.E., Guy, D.R., Bron, J.E., Taggart, J.B., et al. (2016). Genomic  
754 prediction of host resistance to sea lice in farmed Atlantic salmon populations. *Genet.* 48:47.  
755 doi: 10.1186/s12711-016-0226-9.
- 756 Tsairidou, S., 2019 CVrepGPAcalc. <https://github.com/SmaragdaT/CVrep/tree/master/CVrepGPAcalc>  
757 [Accessed March 15, 2020].
- 758 Tsairidou, S., Hamilton, A., Robledo, D., Bron, J.E., and Houston, R.D. (2020). Optimizing Low-Cost  
759 Genotyping and Imputation Strategies for Genomic Selection in Atlantic Salmon. *G3*  
760 (*Bethesda*) 10, 581-590. doi: 10.1534/g3.119.400800.
- 761 Turner, S. (2018). qqman: an R package for visualizing GWAS results using Q-Q and manhattan plots.  
762 *Journal of Open Source Software*, 3(25), 731. <https://doi.org/10.21105/joss.00731>
- 763 Vallejo, R.L., Silva, R.M.O., Evenhuis, J.P., Gao, G., Liu, S., Parsons, J.E., et al. (2018). Accurate  
764 genomic predictions for BCWD resistance in rainbow trout are achieved using low-density  
765 SNP panels: Evidence that long-range LD is a major contributing factor. *J Anim Breed Genet.*  
766 doi: 10.1111/jbg.12335.
- 767 VanRaden, P.M. (2008). Efficient Methods to Compute Genomic Predictions. *J. Dairy Sci.* 91, 4414-  
768 4423. doi: 10.3168/jds.2007-0980.
- 769 Varney, R.L., and Wilbur, A.E. (2020). Analysis of genetic variation and inbreeding among three lines  
770 of hatchery-reared *Crassostrea virginica* broodstock. *Aquaculture* 527:735452. doi:  
771 10.1016/j.aquaculture.2020.735452.
- 772 Vera, M., Pardo, B.G., Cao, A., Vilas, R., Fernández, C., Blanco, A., et al. (2019). Signatures of selection  
773 for bonamiosis resistance in European flat oyster (*Ostrea edulis*): New genomic tools for  
774 breeding programs and management of natural resources. *Evolutionary applications* 12(9),  
775 1781-1796. doi: 10.1111/eva.12832.

- 776 Vu, S.V., Gondro, C., Nguyen, N.T.H., Gilmour, A.R., Tearle, R., Knibb, W., et al. (2021a). Prediction  
777 Accuracies of Genomic Selection for Nine Commercially Important Traits in the Portuguese  
778 Oyster (*Crassostrea angulata*) Using DArT-Seq Technology. *Genes* 12:210. doi:  
779 10.3390/genes12020210.
- 780 Vu, S.V., Knibb, W., Gondro, C., Subramanian, S., Nguyen, N.T.H., Alam, M., et al. (2021b). Genomic  
781 Prediction for Whole Weight, Body Shape, Meat Yield, and Color Traits in the Portuguese  
782 Oyster *Crassostrea angulata*. *Front. Genet.* 12:661276. doi: 10.3389/fgene.2021.661276.
- 783 Vu, S.V., Knibb, W., Nguyen, N.T.H., Vu, I.V., O'Connor, W., Dove, M., et al. (2020). First breeding  
784 program of the Portuguese oyster *Crassostrea angulata* demonstrated significant selection  
785 response in traits of economic importance. *Aquaculture* 518:734664. doi:  
786 10.1016/j.aquaculture.2019.734664.
- 787 Walne, P.R., and Helm, M.M. (1979). Introduction of *Crassostrea gigas* into the United Kingdom,  
788 (Cambridge, MIT Press), 83-105.
- 789 Wan, S., Li, Q., Yu, H., Liu, S., and Kong, L. (2020). Estimating heritability for meat composition traits  
790 in the golden shell strain of Pacific oyster (*Crassostrea gigas*). *Aquaculture* 516:734532. doi:  
791 10.1016/j.aquaculture.2019.734532.
- 792 Wang, J., Li, L., and Zhang, G. (2016). A High-Density SNP Genetic Linkage Map and QTL Analysis of  
793 Growth-Related Traits in a Hybrid Family of Oysters (*Crassostrea gigas* × *Crassostrea*  
794 *angulata*) Using Genotyping-by-Sequencing. *G3 (Bethesda)* 6,1417-1426. doi:  
795 10.1534/g3.116.026971.
- 796 Ward, R.D., Thompson, P.A., Appleyard, S.A., Swan, A.A., and Kube, P.D. (2005). "Sustainable Genetic  
797 Improvement of Pacific Oysters in Tasmania and South Australia", in: *FRDC Project 2000/206*.  
798 CSIRO Marine and Atmospheric Research.
- 799 Werner, C.R., Gaynor, R.C., Gorjanc, G., Hickey, J.M., Kox, T., Abbadi, A., et al. (2020). How  
800 population structure impacts genomic selection accuracy in cross-validation: implications for  
801 practical breeding. *Front. Plant Sci.* 11: 592977. doi: 10.3389/fpls.2020.592977.
- 802 Xu, L., Li, Q., Yu, H., and Kong, L. (2017). Estimates of Heritability for Growth and Shell Color Traits  
803 and Their Genetic Correlations in the Black Shell Strain of Pacific Oyster *Crassostrea gigas*.  
804 *Mar. Biotechnol. (NY)* 19, 421-429. doi: 10.1007/s10126-017-9772-6.
- 805 Yang, B., Zhai, S., Zhang, F., Wang, H., Ren, L., Li, Y., et al. (2022). Genome-wide association study  
806 toward efficient selection breeding of resistance to *Vibrio alginolyticus* in Pacific oyster,  
807 *Crassostrea gigas*. *Aquaculture* 548:737592. doi: 10.1016/k.aquaculture.2021.737592.
- 808 Yin, X., Arias-Pérez, A., Kitapci, T.H., and Hedgecock, D. (2020). High-Density Linkage Maps Based on  
809 Genotyping-by-Sequencing (GBS) Confirm a Chromosome-Level Genome Assembly and  
810 Reveal Variation in Recombination Rate for the Pacific Oyster *Crassostrea gigas*. *G3*  
811 *(Bethesda)* 10, 4691-4705. doi: 10.1534/g3.120.401728.
- 812 Yoshida, G.M., Banger, R., Carvalheiro, R., Correa, K., Figueroa, R., Lhorente J.P., et al. (2018).  
813 Genomic Prediction Accuracy for Resistance Against *Piscirickettsia salmonis* in Farmed  
814 Rainbow Trout. *G3 (Bethesda)* 8, 719-726. doi: 10.1534/g3.117.300499.
- 815 Yoshida, G.M., Lhorente, J.P., Correa, K., Soto, J., Salas, D., and Yañez, J.M. (2019). Genome-Wide  
816 Association Study and Cost-Efficient Genomic Predictions for Growth and Fillet Yield in Nile  
817 Tilapia (*Oreochromis niloticus*). *G3 (Bethesda)* 9, 2597-2607. doi: 10.1534/g3.119.400116.
- 818 Yuehuan, Z., Wu, X., Qin, Y., Xiao, S., Ma, H., Li, J., et al. (2017). Sustained response to selection of  
819 growth traits to the third generation for two strains of Kumamoto oyster *Crassostrea*  
820 *sikamea*. *Journal of Fishery Sciences of China* 24, 1161-1167. doi:  
821 10.3724/SP.J.1118.2017.16350.
- 822 Zenger, K.R., Khatkar, M.S., Jones, D.B., Khalilisamani, N., Jerry, D.R., and Raadsma, H.W. (2019).  
823 Genomic Selection in Aquaculture: Application, Limitations and Opportunities With Special  
824 Reference to Marine Shrimp and Pearl Oysters. *Front. Genet.* 9:693. doi:  
825 10.3389/fgene.2018.00693.

826 Zhang, J., Li, Q., Xu, C., and Han, Z. (2019). Response to selection for growth in three selected strains  
827 of the Pacific oyster *Crassostrea gigas*. *Aquaculture* 503:34-39. doi:  
828 10.1016/j.aquaculture.2018.12.076.  
829 Zhou, X., and Stephens, M. (2012). Genome-wide efficient mixed-model analysis for association  
830 studies. *Nat. Genet.* 44, 821-824. doi: 10.1038/ng.2310.

831  
832  
833  
834  
835  
836  
837  
838  
839  
840  
841  
842  
843  
844  
845  
846  
847  
848  
849  
850  
851  
852  
853  
854  
855  
856  
857  
858  
859  
860  
861  
862  
863  
864  
865  
866  
867  
868  
869  
870  
871  
872
